# Supplementary material for: Development of Terminator–Promoter Bifunctional Elements for Application in Saccharomyces cerevisiae Pathway Engineering
Source: MDPI journal article supplement (doi:10.3390/ijms24129870), 2023-06-07
Supplement: s1 [file s1]

# **Development of terminator–promoter bifunctional elements for application in *Saccharomyces cerevisiae* pathway engineering**

Xiaoxia Ni<sup>†</sup>, Zhengyang Liu<sup>†</sup>, Jintang Guo, Genlin Zhang<sup>\*</sup>

School of Chemistry and Chemical Engineering/Key Laboratory for Green Processing of Chemical Engineering of Xinjiang Bingtuan, Shihezi University, Shihezi, 832003, PR China

<sup>\*</sup> Corresponding author: Genlin Zhang

E-mail: zhgl\_food@sina.com

Tel: +86-18099937255

## Supporting Information

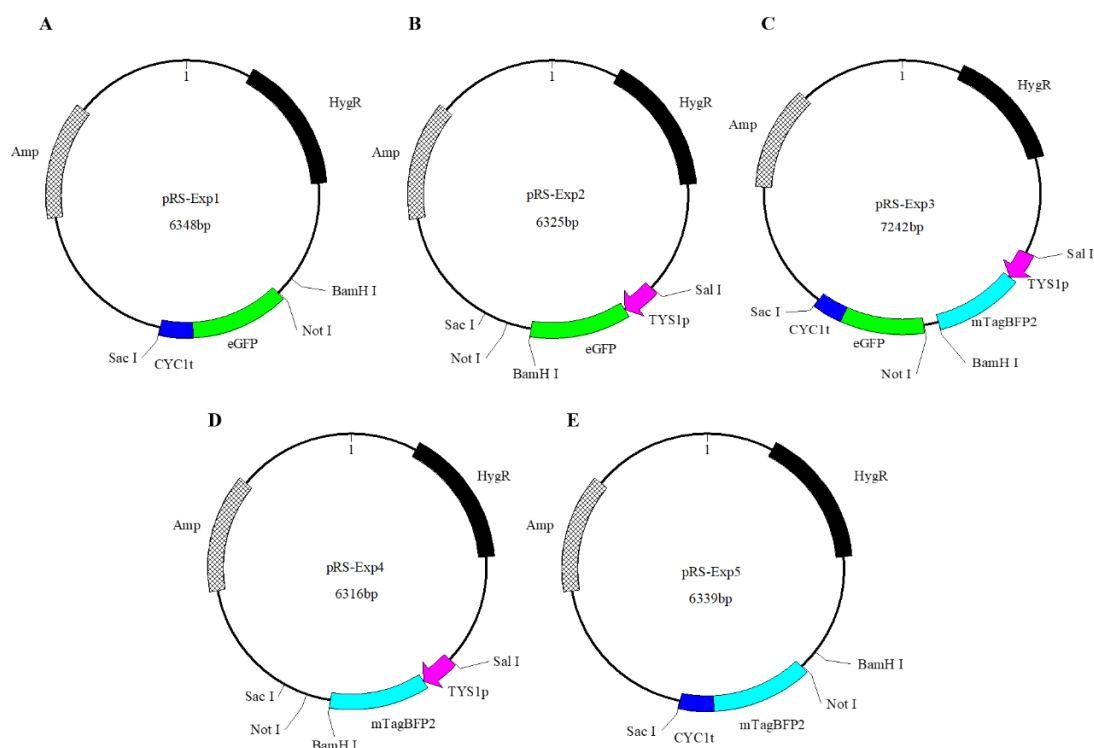

Figure S1. Evaluation of the expression levels of Promoter and terminator functional elements in *Saccharomyces cerevisiae*. **(A)** The plasmid pRS-Exp1 for validation of the promoter function was constituted by inserting the expression cassette GFP-CYC1t into the plasmid PRS41H. **(B)** Similarly, the expression cassette TYSlp-eGFP was inserted into the PRS41H to form pRS-Exp2 for validation of the terminator function. **(C)** And TYSlp-mTagBFP2-eGFP-CYC1t was constructed into the PRS41H to form an expression cassette with missing gene elements between the double transcription units, constituting the functional validation vector pRS-Exp3. All three plasmids A, B, and C were used for the validation of the gene elements designed in this paper in *Saccharomyces cerevisiae*, and the strength of the gene elements was characterized mainly by the relative fluorescence values of the corresponding

fluorescent protein expression. (D) The schematic diagram of plasmid pRS-Exp4, replacing eGFP in pRS-Exp1 with mTagBFP2. (E) The schematic diagram of plasmid pRS-Exp5, replacing eGFP in pRS-Exp2 with mTagBFP2. Constructed the elements to be validated into the corresponding plasmids using a double enzyme digestion (*Bam*HI and *Not*I restriction sites).

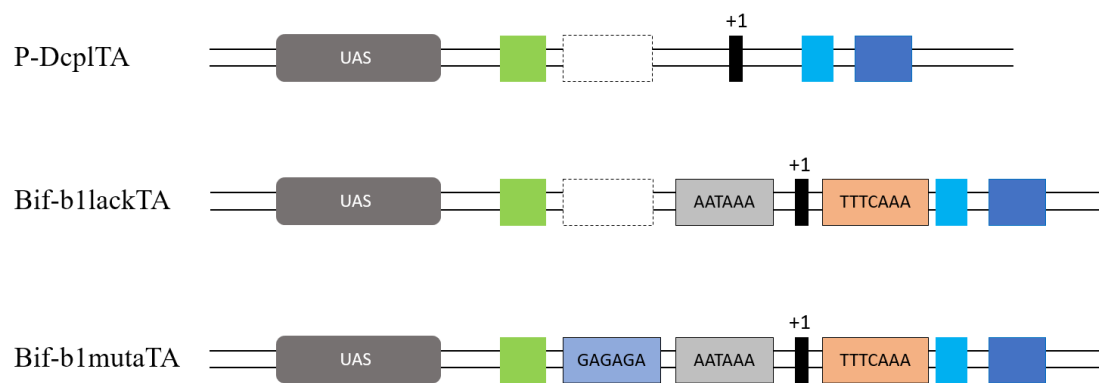

Figure S2. The Schematic illustration of deletion and mutation of TATA sequence. P-DcplTA, promoter P-D<sub>CP</sub> lacks TATAbox. Dashed box represents deletion. Bif-b1lackTA, the terminator-promoter bifunctional element Bif-b1 lacks TATAbox. Bif-b1mutaTA, Bif-b1 mutation TATAbox sequence is GAGAGA.

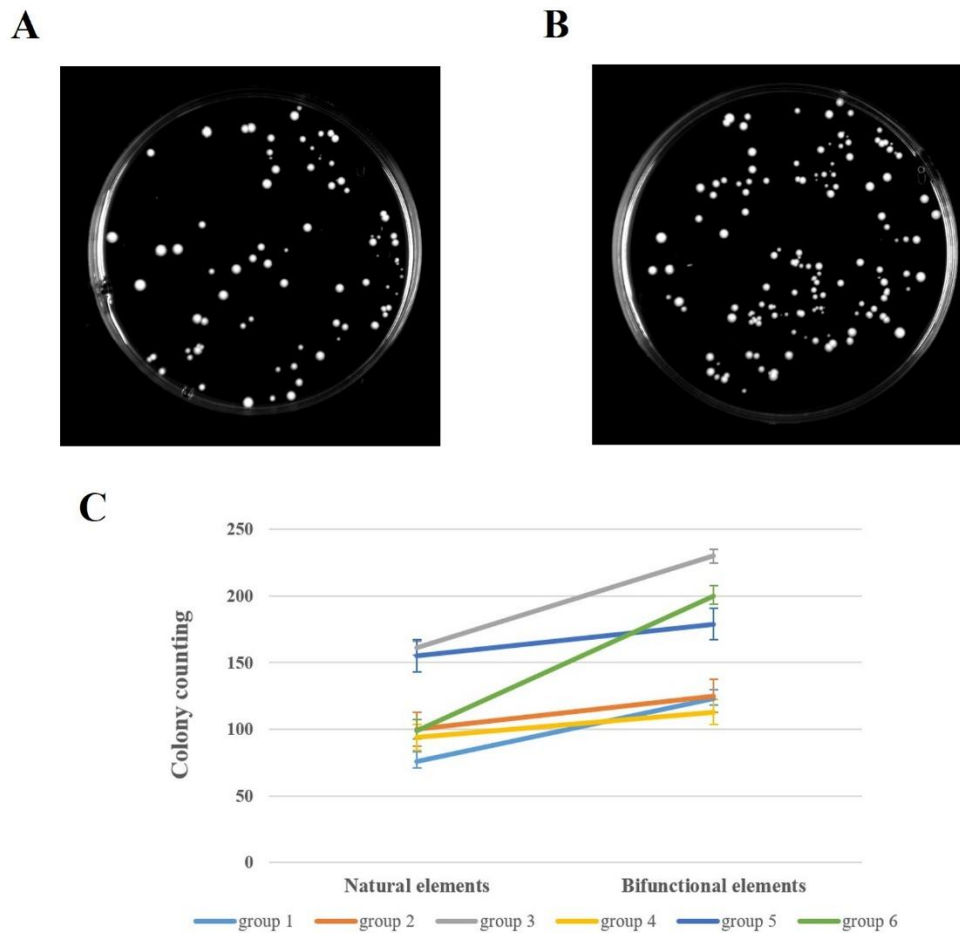

Figure S3. Plate growth of different genetic elements using Gibson assembly to construct transformants. (A) Plasmids used for transformation are constructed from natural genetic elements. (B) Plasmids used for transformation are constructed from terminator-promoter bifunctional elements. (C) Comparison of actual data on colony numbers of transformants constructed using natural gene elements and terminator-promoter bifunctional elements, respectively. Each plate is an independent experiment.

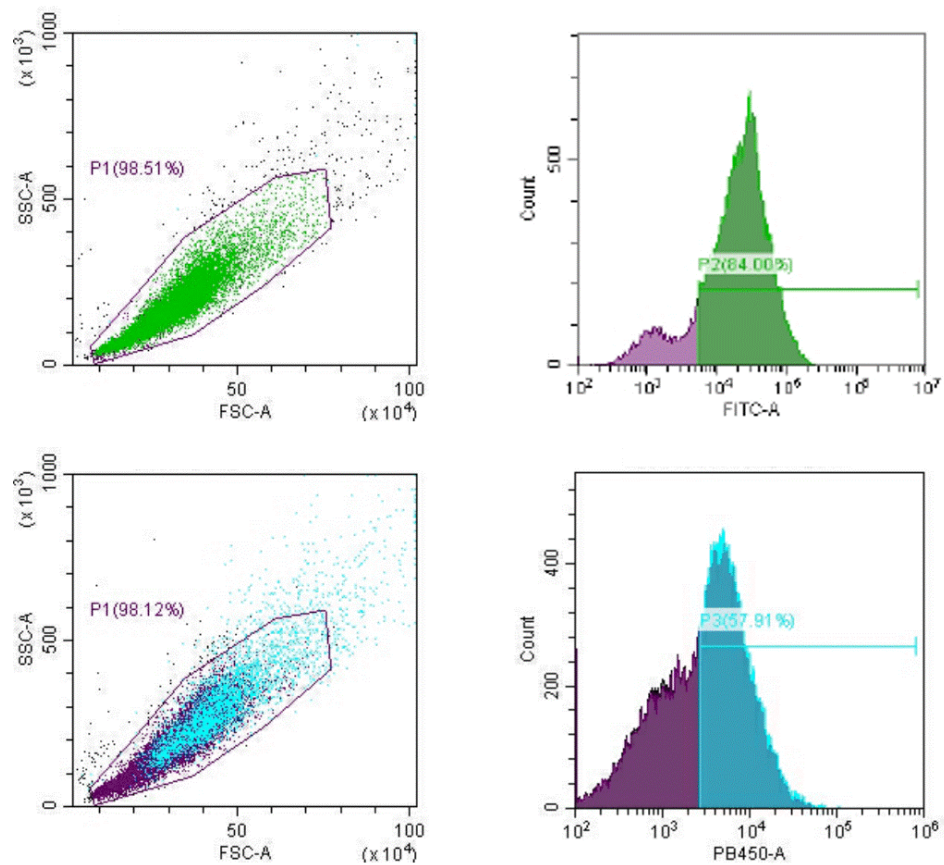

| Population | Events | Total % | Parent % | Mean FITC-A | Mean PB450-A |
|------------|--------|---------|----------|-------------|--------------|
| ● P1       | 19701  | 98.51   | 98.51    | 39617.9     |              |
| ● P1       | 19436  | 98.12   | 98.12    |             | 13290.1      |
| ● P2       | 16800  | 84.00   | 84.00    | 41770.6     |              |
| ● P3       | 11580  | 57.91   | 57.91    |             | 18165.2      |

Figure S4. The raw flow cytometry data of the bifunctional element Bif-b1.

Table S1 Sequences of the synthetic promoter, terminator, and bifunctional element

| Name            | Sequence 5'–3'                                                                                                                                                                                                                                        |
|-----------------|-------------------------------------------------------------------------------------------------------------------------------------------------------------------------------------------------------------------------------------------------------|
| D <sub>CP</sub> | CTCTTGTTTTCTTCTTTTGTATAATATTCTTTTGGCATAATTCTGAGATTG<br>ATTACAAGTGTTTCTGTTGGACGCCATATATAAAAGTTGTTGTTT<br>TTTATCATTTTATCTTCCGTCGCGATCGAACGAGCCGAGCAGAC<br>GTGCCTACGGACCG                                                                                |
| D <sub>T</sub>  | TATATATAACAGTTCTTAATAAAGGGATAGGCCCTTTCAAA                                                                                                                                                                                                             |
| Bif-b1          | TATGTATATGACACCTGGACATACGTATCTGTAGACAGCTTCC<br>TCTACCTCTTGTTTTCTTCTTTTGTATAATATTCTTTTGGCATAATTCTGA<br>GATTTGATTACAAGTGTTTCTGTTGGACGCCATATATAACAGTTCTTA<br>ATAAAATTTTATCATTTTATCTTCCACCTTTCAAAAGTTGTTGTTTCGT<br>CGCGATCGAACGAGCCGAGCAGACGTGCCTACGGACCG |

In element DCP, the green highlighted part is the BRE, the yellow highlighted part is the TATAbox, the black highlighted part is the Inr, A is the transcription start site, the blue highlighted part is the MTE, and the purple highlighted part is DPE. The rest of the linker sequences are the predicted highest active sequences of yeast promoter 1. In element DT, The three different underlines correspond to the efficiency element, position element and Ploy (A) in Figure 1D. In the bifunctional element Bif-b1, red font and green font represent Rap1 and Gcr1 binding sites, respectively.

Table S2 Sequences of transcription factor binding sites in bifunctional elements library L2.

| TFBSs | Sequence 5'–3'    |
|-------|-------------------|
| Rap1  | ACACCTGGACATAC    |
| Gcr1  | ACAGCTTCCTCTAC    |
| Gcr2  | TAGCCCCGGATTAC    |
| Mig1  | GTCGAAGGAGATGCTAG |

Table S3 Sequences combination of transcription factor binding sites in bifunctional elements library L2.

| bifunctional elements | Combination method     |
|-----------------------|------------------------|
| Bif-UAS1              | Rap1, Gcr1             |
| Bif-UAS2              | Rap1, Gcr1, Mig1       |
| Bif-UAS3              | Gcr1, Mig1             |
| Bif-UAS4              | Mig1, Rap1, Gcr1       |
| Bif-UAS5              | Mig1, Rap1, Gcr1, Gcr2 |
| Bif-UAS6              | Gcr1, Rap1             |
| Bif-UAS7              | Gcr1, Gcr2             |
| Bif-UAS8              | Gcr1, Gcr2, Mig1, Rap1 |
| Bif-UAS9              | Gcr1, Rap1, Gcr2, Mig1 |
| Bif-UAS10             | Rap1, Gcr1, Gcr2, Mig1 |

Table S4 Gene Sequences used in this study.

| Name         | Sequence (5'-3')                                                                                                                                                                                                                                                                                                                                                                                                                                                                                                                                                                                                                                                                                                                                                                                              |
|--------------|---------------------------------------------------------------------------------------------------------------------------------------------------------------------------------------------------------------------------------------------------------------------------------------------------------------------------------------------------------------------------------------------------------------------------------------------------------------------------------------------------------------------------------------------------------------------------------------------------------------------------------------------------------------------------------------------------------------------------------------------------------------------------------------------------------------|
| eGFP         | ATGGTGAGCAAGGGAGAAGAAGCTTTTCACTGGAGTTGTCCCAATTCTTG<br>TTGAATTAGATGGTGATGTTAATGGGCACAAATTTTCTGTCAAGTGGAGAG<br>GGTGAAGGTGATGCAACATACGGAAAAGCTTACCCTTAAATTTATTTGCAC<br>TACTGGAAAGCTTCCTGTTTCCTTGGCCAACTTGTCACTACTCTTACTTA<br>TGGTGTTCAATGCTTTTCAAGATACCCAGATCATATGAAGCGGCACGACT<br>TCTTCAAGAGCGCCATGCCTGAGGGATACGTGCAGGAGAGGACCATCTT<br>CTTCAAGGACGACGGGAACTACAAGACACGTGCTGAAGTCAAGTTTGAG<br>GGAGACACCCTCGTCAACAGAATCGAGCTTAAGGGAATCGATTTCAAGG<br>AGGACGGAAACATCCTCGGCCACAAGTTGGAATACAACACTACAACTCCCA<br>CAACGTATACATCATGGCAGACAAACAAAAGAATGGAATCAAAGTTAAC<br>TTCAAAATTAGACACAACATTGAAGATGGAAGCGTTCAACTAGCAGACC<br>ATTATCAACAAAATACTCCAATTGGCGATGGCCCTGTCCTTTTACCAGACA<br>ACCATTACCTGTCCACACAATCTGCCCTTTTCGAAAGATCCCAACGAAAAG<br>AGAGACCACATGGTCCTTCTTGAGTTTGTAACAGCTGCTGGGATTACACA<br>TGGCATGGATGAAGTATACAAATAA |
| mTagBF<br>P2 | ATGGTTTCAAAGGGTGAGGAAGCTTATTAAAGAGAATATGCATATGAAACT<br>TTATATGGAAGGAACAGTTGATAACCATCATTTCAAGTGCACATCAGAAG<br>GAGAAGGAAAGCCGTACGAAGGAACACAAACAATGAGAATTAAAGTTG<br>TTGAAGGAGGACCTCTCCCGTTTGCTTTTCGATATCCTCGCTACCTCCTTCC<br>TCTACGGGAGCAAGACTTTTCATCAATCACACTCAGGGCATAACCGACTTC<br>TTCAAGCAATCATTTCTGAAGGATTACATGGGAAAGAGTTACAACATA<br>TGAAGATGGAGGAGTTCTTACAGCAACACAAGATACATCACTTCAAGAT<br>GGATGTCTTATTTATAACGTTAAGATACGAGGAGTTAACTTTACATCAAAC<br>GGACCTGTTATGCAGAAGAAGACCCTAGGATGGGAAGCATTTACAGAAA<br>CACTTTATCCTGCAGATGGAGGACTTGAAGGAAGAAACGATATGGCACTT<br>AACTTGTGGAGGATCACATCTTATTGCAAACGCAAAGACGACCTATAG<br>ATCAAAGAAGCCAGCAAAGAATTTGAAGATGCCTGGCGTATACTACGTAG                                                                                                                                             |

ACTACAGGCTCGAGAGGATAAAGGAGGCAAACAACGAAACATATGTTGA  
ACAACATGAAGTTGCAGTTGCAAGATATTGTGATCTTCCTTCAAAGTTAG  
GCCATAAACTTAAC

Crt I

ATGGGTAAAGGAACAAGACCAAGACAAGCCAACTGCTATCATCGTTGGTT  
GTGGTATCGGTGGTATCGCTACTGCTGCTAGATTGGCTAAGGAAGGTTTC  
CAAGTTACTGTTTTCGAAAAGAACGACTACTCTGGTGGTAGATGTTCTTT  
GATCGAAAGAGACGGTTACAGATTTCGACCAAGGTCCATCTTTGTTGTTGT  
TGCCAGACTTGTTCAAGCAAACCTTTCGAAGACTTGGGTGAAAAGATGGA  
AGACTGGGTGACTTGATCAAGTGTGAACCAAACACTACGTTTGTCACTTCC  
ACGACGAAGAACTTTCACCTTGTCTACTGACATGGCTTTGTTGAAGAGA  
GAAGTTGAAAGATTTCGAAGGTAAGGACGGTTTCGACAGATTCTTGTCTTT  
CATCCAAGAAGCTCACAGACACTACGAATTGGCTGTTGTTACGTTTTGC  
AAAAGAACTTCCCAGGTTTCGCTGCTTCTTGAGATTGCAATTCATCGGT  
CAAATCTTGGCTTTGCACCCATTTCGAATCTATCTGGACTAGAGTTTGTAGA  
TACTTCAAGACTGACAGATTGAGAAGAGTTTTCTCTTTCGCTGTTATGTAC  
ATGGGTCAATCTCCATACTCTGCTCCAGGTACTTACTCTTTGTTGCAATAC  
ACTGAATTGACTGAAGGTATCTGGTACCCAAGAGGTGGTTTCTGGCAAGT  
TCCAAACACTTTGTTGCAAATCGTTAAGAGAAAACAACCCATCTGCTAAGT  
TCAACTTCAACGCTCCAGTTTCTCAAGTTTTGTTGTCTCCAGCTAAGGAC  
AGAGCTACTGGTGTAGATTGGAATCTGGTGAAGAACACCACGCTGACG  
TTGTTATCGTTAACGCTGACTTGGTTTACGCTTCTGAACACTTGATCCAG  
ACGACGCTAGAAACAAGATCGGTCAATTGGGTGAAGTTAAGAGATCTTG  
GTGGGCTGACTTGGTTGGTGGTAAGAAGTTGAAGGGTTCTTGTCTTCTT  
TGTCTTTCTACTGGTCTATGGACAGAATCGTTGACGGTTTGGGTGGTCAC  
AACATCTTCTTGGCTGAAGACTTCAAGGGTTCTTTCGACACTATCTTCGA  
AGAATTGGGTTTGCCAGCTGACCCATCTTCTACGTTAACGTTCCATCTAG  
AATCGACCCATCTGCTGCTCCAGAAGGTAAGGACGCTATCGTTATCTTGG  
TTCCATGTGGTCACATCGACGCTTCTAACCACAAAGACTACAACAAGTTG  
GTTGCTAGAGCTAGAAAAGTTCGTTATCCACACTTTGTCTGCTAAGTTGGG  
TTTGCCAGACTTCGAAAAGATGATCGTTGCTGAAAAGGTTACGACGCT  
CCATCTTGGGAAAAGGAATTCAACTTGAAGGACGGTTCTATCTTGGGTTT  
GGCTCACAACCTTCATGCAAGTTTTGGGTTTCAGACCATCTACTAGACACC  
CAAAGTACGACAAGTTGTTCTTCGTTGGTGCTTCTACTCACCCAGGTACT  
GGTGTTCCAATCGTTTTGGCTGGTGCTAAGTTGACTGCTAACCAAGTTTT  
GGAATCTTTCGACAGATCTCCAGCTCCAGACCCAAACATGTCTTTGTCTG  
TTCCATACGGTAAGCCATTGAAGTCTAACGGTACTGGTATCGACTCTCAA  
GTTCAATTGAAGTTCATGGACTTGGAAGATGGGTTTACTTGTGGTTTT  
GTTGATCGGTGCTGTTATCGCTAGATCTGTTGGTGTTTTGGCTTTCTAA  
ATGAACAACCCATCTTTGTTGAACCACGCTGTTGAAACTATGGCTGTTGG  
TTCTAAGTCTTTCGCTACTGCTTCTAAGTTGTTTCGACGCTAAGACTAGAA  
GATCTGTTTTGATGTTGTACGCTTGGTGTAAGACACTGTGACGACGTTATCG  
ACGACCAAACCTTTGGGTTTCCAAGCTAGACAACCAGCTTTGCAAACCTCC  
AGAACAAGATTGATGCAATTGGAATGAAGACTAGACAAGCTTACGCT  
GGTTCTCAAATGCACGAACCAGCTTTCGCTGCTTTCCAAGAAGTTGCTAT  
GGCTCACGACATCGCTCCAGCTTACGCTTTCGACCACTTGGAAGGTTTCG  
CTATGGACGTTAGAGAAGCTCAATACTCTCAATTGGACGACACTTTGAGA  
TACTGTTACCACGTTGCTGGTGTGTTGGTTTGATGATGGCTCAAATCATG  
GGTGTTAGAGACAACGCTACTTTGGACAGAGCTTGTGACTTGGGTTTGG  
CTTTCCAATTGACTAACATCGCTAGAGACATCGTTGACGACGCTCACGCT  
GGTAGATGTTACTTGCCAGCTTCTTGGTTGGAACACGAAGGTTTGAACAA  
GGAAAACACTACGCTGCTCCAGAAAACAGACAAGCTTTGTCTAGAATCGCT  
AGAAGATTGGTTCAAGAAGCTGAACCATACTACTTGTCTGCTACTGCTGG  
TTTGGCTGGTTTGCCATTGAGATCTGCTTGGGCTATCGCTACTGCTAAGCA  
AGTTTACAGAAAGATCGGTGTTAAGGTTGAACAAGCTGGTCAACAAGCT  
TGGGACCAAAGACAATCTACTACTACTCCAGAAAAGTTGACTTTGTTGTT  
GGCTGCTTCTGGTCAAGCTTTGACTTCTAGAATGAGAGCTCACCCACCAA  
GACCAGCTCACTTGTGGCAAAGACCATTTGTAA

Crt B



|       |                                                                                                                                                                                                                                                                                                                                                                                                                                                                                                                       |
|-------|-----------------------------------------------------------------------------------------------------------------------------------------------------------------------------------------------------------------------------------------------------------------------------------------------------------------------------------------------------------------------------------------------------------------------------------------------------------------------------------------------------------------------|
| TYS1p | TCCTTGCGCTTACTCGAATAGGCCTCCCTAGCTATTCTTCAACCTTTTCGAA<br>CCATCCATACTTCTTACTATCATAATTTTATTTTATCATGGAGGCGAGAAG<br>GTCCTTATTCGAGCATCACTAAGAACGGAACCTCGAACATTTACAAAGTAG<br>AAAAATTTTATGAAAATTAATTGTTCTTTCTTCAGAATACAAATTAGTCATT<br>GTCAAAAAGAGATTAGCATCCATAACCGCATACTCTAATTGACGATAACA                                                                                                                                                                                                                                      |
| CYC1t | TCATGTAATTAGTTATGTCACGCTTACATTCACGCCCTCCCCCACATCCG<br>CTCTAACCGAAAAGGAAGGAGTTAGACAACCTGAAGTCTAGGTCCCTAT<br>TTATTTTTTTTATAGTTATGTTAGTATTAAGAACGTTATTTATATTTCAAATTTT<br>TCTTTTTTTTCTGTACAGACGCGTGTACGCATGTAACATTATACTGAAAAC<br>CTTGCTTGAGAAGGTTTTGGGACGCTCGAAGGCTTTAATTTGC                                                                                                                                                                                                                                              |
| CYC1p | GCATGCATGTGCTCTGTATGTATATAAACTCTTGTTTTCTTCTTTTCTCTA<br>AATATTCTTTCCTTATACATTAGGACCTTTGCAGCATAAATTACTATACTTC<br>TATAGACACACAAACACAAATACACACACTAAATTAATA                                                                                                                                                                                                                                                                                                                                                                |
| ADH1t | AGTTATAAAAAAATAAGTGTATACAAATTTTAAAGTGACTCTTAGGTTTT<br>AAAACGAAAATTCTTATTCTTGAGTAACTCTTCCTGTAGGTCAGGTTGCT<br>TTCTCAGGTATAGCATGAGGTCGCTCTTATTGACCACACCTCTACCGGCAT<br>GCCGA                                                                                                                                                                                                                                                                                                                                              |
| ADALt | AGGGATTAATTAATCGTAAGGAAAAATAAAATAATAGTGCTGTGATCGC<br>ATGATATTCTTCCCTGGAAGCGCCATTTTATAGCAAGAAATGTAAGTCAAG<br>TATATTTTAACTGTATATCAACAATATAGCTCTTTTTTATGCCTTGTTGTTTT<br>TCTTCGGGTTTTCCCCACACATTGTGTGGAGAGATAGTTATTAACAGACC<br>GGAAAATAGCCGCCCAAGGATAAACTTTTATATAAAGGGAAGGGTAGTTG<br>ACCCAAAAAATTTGGATTCTACTTTTCCAGATTACTTTTACCCTTTTATAT<br>TTGCTGTAGTCTGTTATGCCAATCAGGAAAGCATTTGAACAAATATGTCTG<br>TTACAGGAACTGAGATCGATAGTGATACAGCAAAAAATATTCTTAGTGTA<br>GATGAATTACAGAACTATGGTATTAATGCCTCAGATCTTCAAAAATTGAAG<br>TCTGGTGGG |

Table S5. Primers used for the construction of the lycopene synthesis pathway based on the synthetic bifunctional elements

| Strains | Primers    | Sequence (5'-3')                                               |
|---------|------------|----------------------------------------------------------------|
| Tl-1    | CYC1p-F    | GATATCGAATTCCTGCAGCCCCGGGGCATGCATGTGCTCTGTATG                  |
|         | CYC1p-R    | GTTCAACAAAGATGGGTGTTTCATTATTAATTTAGTGTGTGTTTGTG<br>TTTGTGTG    |
|         | CrtB-F     | CACACAAACACAAATACACACACTAAATTAATAATGAACAACCCATCT<br>TTGTTGAAC  |
|         | CrtB-R     | AATTTGTATACACTTATTTTTTTTATAACTTTACAATGGTCTTTGCCACA<br>AGTG     |
|         | ADH1t-F    | CACTTGTGGCAAAGACCATTGTAAAGTTATAAAAAAATAAGTGTATA<br>CAAATT      |
|         | ADH1t-R    | CCTATTCGAGTAAGCGCAAGGATCGGCATGCCGGTAGAGG                       |
|         | TYS1p-F    | CCTCTACCGGCATGCCGATCCTTGCGCTTACTCGAATAGG                       |
|         | TYS1p-R    | GTCTTGGTCTTGTTTCCTTACCCATTGTTATCGTCAATTAGAGTATGCGG             |
|         | CrtI-F     | CCGCATACTCTAATTGACGATAACAATGGGTAAGGAACAAGACCAAG<br>AC          |
|         | CrtI-R     | ATTTTATTTTTCTTACGATTTAATTAATCCCTTTAGAAAGCCAAAACA<br>CCAACAGATC |
|         | ADALt-F    | GATCTGTTGGTGTTTTGGCTTTCTAAAGGGATTAATTAATCGTAAGGA<br>AAAATAAAAT |
|         | ADALt-R    | CGGCCGCTCTAGAACTAGTGGATCCCCACCAGACTTCAATTTTTG                  |
|         | T1-F       | GATATCGAATTCCTGCAGCCCCGGGGCATGCATGTGCTCTGTATG                  |
|         | T1-R       | CGGCCGCTCTAGAACTAGTGGATCCCCACCAGACTTCAATTTTTG                  |
| SI-1    | Bif-2*TA-F | CCGGGCCCCCCTCGAGTATGTATATGACACCTGGAC                           |
|         | Bif-2*TA-R | CAACAAAGATGGGTGTTTCATCGGTCCGTAGGCACGTCTGC                      |
|         | Crt B-F    | GCAGACGTGCCTACGGACCGATGAACAACCCATCTTTGTTG                      |
|         | Crt B-R    | CTCCTTCGACCATATACATATTACAATGGTCTTTGCCAC                        |

|      |              |                                             |
|------|--------------|---------------------------------------------|
|      | Bif-UAS4-F   | GTGGCAAAGACCATTGTAATATGTATATGGTCGAAGGAG     |
|      | Bif-UAS4-R   | GGTCTTGTTCCCTTACCCATCGGTCCGTAGGCACGTC       |
|      | Crt I-F      | GCAGACGTGCCTACGGACCG ATGGGTAAGGAACAAGACCAAG |
|      | Crt I-R      | CTATTCTCTCATATACATATTAGAAAGCCAAAACACCAAC    |
|      | Bif-U7-F     | GTTGGTGTTTTGGCTTTCTAATATGTATATGAGAGAATAG    |
|      | Bif-U7-R     | GGCTGCAGGAATTCGATATCCGGTCCGTAGGAGTAAC       |
|      | SI-1-F       | CCGGGCCCCCCTCGAGTATGTATATGACACCTGGAC        |
|      | SI-1-R       | GGCTGCAGGAATTCGATATCCGGTCCGTAGGAGTAAC       |
| S1-2 | Bif-TATTTA-F | CCGGGCCCCCCTCGAGTATGTATATGACACCTGGAC        |
|      | Bif-TATTTA-R | CAACAAAGATGGGTTGTTTCATCGGTCCGTAGGCACGTCTGC  |
|      | Crt B-F      | GCAGACGTGCCTACGGACCGATGAACAACCCATCTTTGTTG   |
|      | Crt B-R      | GAGGAAGCTGTCATATACATATTACAATGGTCTTTGCCAC    |
|      | Bif-UAS9-F   | CTTGTGGCAAAGACCATTGTAATATGTATATGACAGCTTCCTC |
|      | Bif-UAS9-R   | CTTGGTCTTGTTCCCTTACCCATCGGTCCGTAGGCACGTCTGC |
|      | Crt I-F      | GCAGACGTGCCTACGGACCGATGGGTAAGGAACAAGACCAAG  |
|      | Crt I-R      | GATAGTTACCCATATACATATTAGAAAGCCAAAACACCAAC   |
|      | Bif-U6-F     | GTTGGTGTTTTGGCTTTCTAATATGTATATGGGTAACATC    |
|      | Bif-U6-R     | GGCTGCAGGAATTCGATATCCGGTCCGTAGCTCTTATC      |
|      | SI-2-F       | CCGGGCCCCCCTCGAGTATGTATATGACACCTGGAC        |
|      | SI-2-R       | GGCTGCAGGAATTCGATATCCGGTCCGTAGCTCTTATC      |
| S1-3 | Bif-3*TA-F   | CCGGGCCCCCCTCGAGTATGTATATGACACCTGGAC        |
|      | Bif-3*TA-R   | CAACAAAGATGGGTTGTTTCATCGGTCCGTAGGCACGTCTGC  |
|      | Crt B-F      | GCAGACGTGCCTACGGACCGATGAACAACCCATCTTTGTTG   |
|      | Crt B-R      | CTCCTTCGACCATATACATATTACAATGGTCTTTGCCAC     |
|      | Bif-UAS5-F   | GTGGCAAAGACCATTGTAATATGTATATGGTCGAAGGAG     |
|      | Bif-UAS5-R   | GGTCTTGTTCCCTTACCCATCGGTCCGTAGGCACGTC       |
|      | Crt I-F      | GCAGACGTGCCTACGGACCGATGGGTAAGGAACAAGACCAAG  |
|      | Crt I-R      | ATCTGACTTACATATACATATTAGAAAGCCAAAACACCAAC   |
|      | Bif-U2-F     | GTTGGTGTTTTGGCTTTCTAATATGTATATGTAAGTCAGAT   |
|      | Bif-U2-R     | GGCTGCAGGAATTCGATATCCGGTCCGTAGAGGTTTC       |
|      | SI-3-F       | CCGGGCCCCCCTCGAGTATGTATATGACACCTGGAC        |
|      | SI-3-R       | GGCTGCAGGAATTCGATATCCGGTCCGTAGAGGTTTC       |

## References

1. Lubliner, S.; Keren, L.; Segal, E., Sequence features of yeast and human core promoters that are predictive of maximal promoter activity. *Nucleic Acids Res.* **2013**, *41* (11), 5569-5581.
